# Supplementary material for: Βarriers and Gaps to Medical Care for Transgender Individuals: A TRANSCARE Scoping Review with a Focus on Greece
Source: MDPI journal article supplement (doi:10.3390/healthcare12060647), 2024-03-13
Supplement: s1 [file s1]

**Supplementary Table S2.** General characteristics of documents identified from PubMed search (N=65) and other sources (N=4).

| Authors                | Journal          | Publication Year | Study type     | Population/sample             | Country/setting | Area/disease of focus | Barriers                                                                                                                                                                                                                                                                                                                                                                                                          | Facilitators                                                                                  |
|------------------------|------------------|------------------|----------------|-------------------------------|-----------------|-----------------------|-------------------------------------------------------------------------------------------------------------------------------------------------------------------------------------------------------------------------------------------------------------------------------------------------------------------------------------------------------------------------------------------------------------------|-----------------------------------------------------------------------------------------------|
| Goldenberg et al. (80) | Transgend Health | 2020             | Survey data    | 171 trans youth, 15-24 yo     | USA             | HC utilization        | More positive sense of identity was associated with reduced difficulty accessing care for participants experiencing less stigma. Participants who experienced more anticipated stigma were less likely to use medical gender affirmation services.                                                                                                                                                                | Positive sense of identity, social support                                                    |
| Fung et al. (79)       | Can Med Educ J   | 2020             | Qualitative    | 11 medical residents          | Canada          | medical education     | Lack of education, discomfort due to inexperience and lack of knowledge                                                                                                                                                                                                                                                                                                                                           |                                                                                               |
| Ziegler et al. (78)    | Transgend Health | 2020             | Qualitative    | HCPs                          | Canada          | PHC delivery          | Lack of service coordination within organizations, lack of practitioner education                                                                                                                                                                                                                                                                                                                                 | Continuing educational sessions, guidelines, and mentorship                                   |
| Kcomt et al. (77)      | SSM Popul Health | 2020             | Survey data    | 19,157 trans adults, 25-64 yo | USA             | HC utilization        | Discrimination, poverty, visual non-conformity                                                                                                                                                                                                                                                                                                                                                                    | Having health insurance, disclosure of transgender identity                                   |
| Dhillon et al. (76)    | Am J Mens Health | 2020             | Scoping review | Trans men                     | Global          | Cancer                | Psychological discomfort and physical pain, sub-optimal patient-provider relationships, absence of a nonbinary approach to gender identity and health, lack of explanations, lack of sensitivity knowledge and experience, lack of cultural competence, including the use of appropriate pronouns, discrimination, "stereotypical" feminine/masculine aesthetics in HC services, challenges with health insurance | Establishing trusted relationship, accepting gender identity, safe and welcoming environment, |

|                          |                                 |      |                               |                                        |            |                  |                                                                                                                                                                                                                                                                    |                                                                                                                                                                                                                          |
|--------------------------|---------------------------------|------|-------------------------------|----------------------------------------|------------|------------------|--------------------------------------------------------------------------------------------------------------------------------------------------------------------------------------------------------------------------------------------------------------------|--------------------------------------------------------------------------------------------------------------------------------------------------------------------------------------------------------------------------|
| Lambrou et al.<br>(75)   | Transgend Health                | 2020 | Qualitative                   | 12 transmasculine adults, 18-35 yo     | USA        | HC delivery      | Inadequate healthcare system that largely relies on essentialist, binary sex/gender framework, trans people being “forced” to accept a gender diagnosis, practitioners demonstrating “gatekeeping” power to withhold care                                          |                                                                                                                                                                                                                          |
| de Santis et al.<br>(74) | Perspect Psychiatr Care         | 2020 | Mixed-methods                 | 75 trans women                         | USA        | HC delivery      | Gaps in healthcare insurance coverage, personal financial issues, fragmented HC services (multiple doctors, different locations), lack of LGBTQI+ people in healthcare, refusal of services, discrimination, unstable relationships, poor communication with HCPs. | Treated as “regular” not “special clients, connection and communication with HCPs, mutually developed care plans, trust, provider willingness to be educated, employment of trans patient/client advocates and educators |
| Gamariel et al.<br>(73)  | PLoS One                        | 2020 | Qualitative                   | 9 trans women and 18 cis MSM, 19-47 yo | Mozambique | HC access        | Stigma and discrimination due to sexual identity, HIV-related stigma, gossip, breach of confidentiality in HC services                                                                                                                                             | Peer educators with broad scope, social media as a means of engaging with health messaging                                                                                                                               |
| Kattari et al.<br>(72)   | SSM Popul Health                | 2019 | Survey data                   | 27,715 trans/nonbinary adults          | USA        | mental health    | Individuals with mental health were significantly less likely to have a provider that treated them with respect and more likely to have needed to educate their provider on trans issues                                                                           |                                                                                                                                                                                                                          |
| Zwickl et al.<br>(70)    | Int J Environ Res Public Health | 2019 | Online survey                 | 928 trans adults                       | Australia  | Needs assessment | Lack of trained HCPs, lack of gender services, lack of mainstreaming HC services in primary care                                                                                                                                                                   |                                                                                                                                                                                                                          |
| Haviland et al.<br>(71)  | Oncol Nurs Forum                | 2020 | Integrative literature review | LGBTQI+ adults                         | Global     | Cancer care      | Lack of cancer screening data and knowledge about screening guidelines by LGBTQI+Q populations and providers                                                                                                                                                       | Provider-created welcoming environments and caregiver inclusion                                                                                                                                                          |

|                     |                               |      |             |                          |              |                          |                                                                                                                                                                                                                                                                              |                                                                                                                                                                                                                             |
|---------------------|-------------------------------|------|-------------|--------------------------|--------------|--------------------------|------------------------------------------------------------------------------------------------------------------------------------------------------------------------------------------------------------------------------------------------------------------------------|-----------------------------------------------------------------------------------------------------------------------------------------------------------------------------------------------------------------------------|
| Yan et al. (84)     | Infect Dis Poverty            | 2019 | Qualitative | >14 trans women          | China        | HC utilization           | Long and challenging identity search, stigma and discrimination, poor access to trans-specific services and unmet needs for mental health care, culturally-shaped expectations, low perceptions of HIV risk                                                                  |                                                                                                                                                                                                                             |
| Griffin et al. (69) | Transgend Health              | 2019 | Survey data | 66 trans adults          | USA          | Needs assessment         | Lack of mental health support and community stigma and personal financial barriers were associated with poorer health perceptions. Perceptions of lack of safety were associated with poorer health perceptions.                                                             |                                                                                                                                                                                                                             |
| Hines et al. (68)   | J Assoc Nurses AIDS Care      | 2019 | Qualitative | 18 trans women, 21-60 yo | USA          | HC utilization           | Clinicians who don't understand, fragmented care, lack of insurance, low volume of transgender-competent clinicians                                                                                                                                                          | Provision of gender-affirming care, fostering patient engagement, performing appropriate health screenings, willingness to learn about transgender health.                                                                  |
| Fauk et al. (67)    | PLoS One                      | 2019 | Qualitative | 29 trans women with HIV  | Indonesia    | HIV care                 | Limited availability of the services, limited simplicity and convenience of accessibility to services and discomfort felt while accessing the services                                                                                                                       | HCPs' positive attitudes during care provision, social relationships between trans patients and HCPs, proximity to healthcare facilities, free access to the services, information sessions on HIV infection and prevention |
| Luvuno et al. (66)  | Afr J Prim Healthcare Fam Med | 2019 | Qualitative | 9 trans adults           | South Africa | Sexual/reproductive care | Hostile and discriminatory behavior by HCPs, no disclosure of trans identity, inability to provide care, violation of bodily privacy and confidentiality, treating trans patients as mentally unstable, doubts expressed by HCPs about trans identity, being made to conform |                                                                                                                                                                                                                             |

|                      |                  |      |                               |                                                      |        |                          |                                                                                                                                                                                                                              |                                                                                                                 |
|----------------------|------------------|------|-------------------------------|------------------------------------------------------|--------|--------------------------|------------------------------------------------------------------------------------------------------------------------------------------------------------------------------------------------------------------------------|-----------------------------------------------------------------------------------------------------------------|
|                      |                  |      |                               |                                                      |        |                          | with assigned gender, unappealing service's environment, intimidating and offer religious behaviors                                                                                                                          |                                                                                                                 |
| Acosta et al. (65)   | Psychiatr Q      | 2019 | Qualitative                   | 9 trans adolescents, 18 HCPs                         | USA    | Psychiatric care         | Incorrect use of preferred names/pronouns, legal name in electronic medical record as a barrier to engagement, HCPs uncertainty regarding the authenticity of patient's gender identity                                      | Gaining understanding from patients as a resource to familiarize with terminology and process                   |
| Harb et al. (64)     | Transgend Health | 2019 | Survey data                   | 17 trans/genderqueer assigned female at birth adults | USA    | Sexual/reproductive care | Lack of personal awareness about HPV, limited availability of competent care, distress about seeking sexual care, unappealing healthcare setting characteristics                                                             | HCPs' role and relationship                                                                                     |
| Jennings et al. (62) | Prev Med Rep     | 2019 | National survey data          | 73 LGB, 25 trans, 1830 cis adults                    | USA    | HC utilization           | Trans adults were 2.76 times more likely to report poor quality of care and 2.78 times unfair treatment when receiving medical care than cisgender adults                                                                    |                                                                                                                 |
| Breland et al. (63)  | Transgend Health | 2019 | Mixed-methods                 | 33 Trans/gender nonconforming youth, 29 caregivers   | USA    | HC utilization           | Lack of accessible mental health providers, difficulty scheduling mental health assessment appointments, geographic distance, length of time between the readiness assessment and hormone initiation.                        | Respectful care delivery, consistent use of patients' preferred name and pronouns, presence of a care navigator |
| Cicero et al. (61)   | ANS ADV Nurs Sci | 2019 | Integrative literature review | Trans adults                                         | Global | HC utilization           | Stigma, prejudice, discrimination, restricted health insurance benefits for medically necessary care, barriers to primary and preventative healthcare due to scarcity of available, knowledgeable, and affirming clinicians. | Social gender affirmation                                                                                       |
| Phillips et al. (60) | AIDS Care        | 2019 | Survey data                   | 890 young MSM and trans youth assigned male at birth | USA    | HC utilization           | Low awareness of available services was associated with how and where trans youth seek care, with 76% reporting this as their                                                                                                |                                                                                                                 |

|                      |                         |      |               |                                        |             |                               |                                                                                                                                                                                                                                                          |                                                                                                                                                |
|----------------------|-------------------------|------|---------------|----------------------------------------|-------------|-------------------------------|----------------------------------------------------------------------------------------------------------------------------------------------------------------------------------------------------------------------------------------------------------|------------------------------------------------------------------------------------------------------------------------------------------------|
|                      |                         |      |               |                                        |             |                               | primary reason for not seeking specific sexual health services.                                                                                                                                                                                          |                                                                                                                                                |
| Velez et al. (59)    | Transgend Health        | 2019 | Survey data   | 52 trans/gender nonconforming adults   | Puerto Rico | Social determinants of health | Lack of knowledgeable providers, discomfort during the encounter                                                                                                                                                                                         |                                                                                                                                                |
| Frank et al. (58)    | Transgend Health        | 2019 | Survey data   | 273 young trans women                  | USA         | Needs assessment              | Avoiding healthcare due to cost and experiencing prior transgender-specific discrimination in a medical setting were associated with greater odds of having unmet healthcare needs.                                                                      |                                                                                                                                                |
| Stroumsa et al. (57) | Med Educ                | 2019 | Online survey | 223 primary care providers             | USA         | Medical education             | Transphobia rather than education predicts provider knowledge of transgender health care.                                                                                                                                                                |                                                                                                                                                |
| Harper et al. (56)   | AIDS Patient Care STDS. | 2019 | Qualitative   | 66 trans/gender-diverse youth with HIV | USA         | HIV care                      | Challenges in: confidentiality and privacy, service delivery, location of services, navigating the system, availability and awareness of services, discontinuity of care, negative provider interactions, instrumental support, disclosure of HIV status |                                                                                                                                                |
| Marshall et al. (55) | Transgend Health        | 2018 | Mixed-methods | 96 trans and 28 cis adults             | USA         | Needs assessment              | Challenges in: insurance coverage, access to and availability of transition-related care, and education of healthcare providers about trans issues.                                                                                                      |                                                                                                                                                |
| Shires et al. (54)   | Ann Fam Med             | 2018 | Survey data   | 308 primary care providers             | USA         | Care provision                | Willingness to provide routine care decreased with provider age.                                                                                                                                                                                         | Willingness to provide Pap tests was higher among family physicians, those who had met a transgender person, and those with lower transphobia. |
| Kamen et al. (53)    | Support Care Cancer     | 2019 | Qualitative   | 273 LGBTQI+Q adults with cancer        | USA         | Cancer care                   | LGBTQI+ patients with cancer: are affected by providers' LGBTQI+-specific knowledge and skills, assumptions, and mistreatment,                                                                                                                           |                                                                                                                                                |

|                     |                     |      |             |                                     |             |                             |                                                                                                                                                                                                                                                                                                                                         |                                                                                                  |
|---------------------|---------------------|------|-------------|-------------------------------------|-------------|-----------------------------|-----------------------------------------------------------------------------------------------------------------------------------------------------------------------------------------------------------------------------------------------------------------------------------------------------------------------------------------|--------------------------------------------------------------------------------------------------|
|                     |                     |      |             |                                     |             |                             | negotiate disclosure of identities based on the safety of clinical encounters, have different experiences based on multiple intersecting identities, receive more effective care when members of their support networks are included                                                                                                    |                                                                                                  |
| Brumer et al. (52)  | PLoS One            | 2018 | Qualitative | 14 trans adults                     | USA         | Social determinants of care | Stigma and discrimination in healthcare settings, health-related information attained through social networks and online, gender identity, race and pervasive marginalization are key social determinants of transgender health                                                                                                         |                                                                                                  |
| Greene et al. (82)  | PLoS One            | 2018 | Survey data | 1010 HC students                    | USA         | Medical education           | While 70-74% of respondents felt comfortable treating LGBTQI+ patients, fewer than 50% agreed that their formal training had prepared them to do so.                                                                                                                                                                                    |                                                                                                  |
| Coutin et al.(81)   | Can Med Educ J      | 2018 | Survey data | 556 medical residents               | Canada      | Medical education           | Only 17% of participants predicted they would feel competent to provide specialty-specific trans-care by the end of their residency and only 12% felt that their training was adequate to care for this population.                                                                                                                     |                                                                                                  |
| Fisher et al. (51)  | LGBTQI+ Health      | 2018 | Survey data | 228 trans/nonbinary youth, 14-21 yo | Puerto Rico | HIV care                    | Stigma and confidentiality concerns: Nearly half of respondents had not disclosed their identity to their provider due to concern about an unaccepting provider. One-quarter were less inclined to discuss identity and sexual health with their provider due to concern that their provider would disclose this information to parents | Being out to parents about gender identity and having received gender-affirming hormone therapy. |
| Gahagan et al. (50) | Int J Equity Health | 2018 | Survey data | 283 LGBTQI+ adults, 109 HCPs        | Canada      | PHC delivery                | Uncertainty about the level of LGBTQI+-friendliness of their family doctor, their                                                                                                                                                                                                                                                       | Self-care, personal coping skills, self-esteem, safe and                                         |

|                    |                        |      |                               |                                             |        |               |                                                                                                                                                                                                                                                                                                                                                                                                                                                                                                                                                                                                                                                                                                                                                                    |                                                                                                                                                                                                                   |
|--------------------|------------------------|------|-------------------------------|---------------------------------------------|--------|---------------|--------------------------------------------------------------------------------------------------------------------------------------------------------------------------------------------------------------------------------------------------------------------------------------------------------------------------------------------------------------------------------------------------------------------------------------------------------------------------------------------------------------------------------------------------------------------------------------------------------------------------------------------------------------------------------------------------------------------------------------------------------------------|-------------------------------------------------------------------------------------------------------------------------------------------------------------------------------------------------------------------|
|                    |                        |      |                               |                                             |        |               | <p>knowledge and cultural competence about, and the inclusiveness of the healthcare system. HCPs reported feeling discomfort when having to address LGBTQI+ specific issues with their patients, such as access to transition services for trans patients or family planning/reproductive health, mental health, domestic abuse and problematic drug use. Only 9.4% of HCPs indicated that they felt 'very knowledgeable' about issues related to gender identity/expression. HCPs identified the need for further education regarding LGBTQI+Q populations (e.g. CME LGBTQI+Q knowledge, communication skills, etc.), 43.4% considered inclusive signs and posters very important, and 49.1% considered language used in medical intake forms very important.</p> | <p>inclusive social environment, social support, access to LGBTQI+-friendly/safe spaces, community mental health resources</p>                                                                                    |
| Beight et al. (49) | Transgend Health       | 2018 | Qualitative                   | 11 trans adults                             | Sweden | Mental health | <p>Feeling objectification rather than subjectivity, need to confirm their identity rather than addressing mental health issues. Fearing the system (feelings of dependence and obligation, distrust, inflexibility of procedures, burden to behave in particular ways, lack of communication, focus on personal life rather than the problem, judgmental services, delays in care)</p>                                                                                                                                                                                                                                                                                                                                                                            | <p>Including trans persons as advocates or as mentors into the care plans.</p>                                                                                                                                    |
| Heard et al. (48)  | Pediatric Child Health | 2018 | Medical records/online survey | 199 trans children/adolescents, 4.7-17.8 yo | Canada | Mental health | <p>Adversity in healthcare settings, stress over long wait times for mental health services</p>                                                                                                                                                                                                                                                                                                                                                                                                                                                                                                                                                                                                                                                                    | <p>Increasing HCPs' education on gender affirmative care, providing gender sensitivity training for HCPs, gathering preferred names and pronouns during triage, increasing visibility of support for LGBTQI++</p> |

|                     |                       |      |                                 |                                                      |       |                         |                                                                                                                                                                                                                                                                                                                                                                                                                                                                                                                                                                                                                                    |                                                                                                                                   |
|---------------------|-----------------------|------|---------------------------------|------------------------------------------------------|-------|-------------------------|------------------------------------------------------------------------------------------------------------------------------------------------------------------------------------------------------------------------------------------------------------------------------------------------------------------------------------------------------------------------------------------------------------------------------------------------------------------------------------------------------------------------------------------------------------------------------------------------------------------------------------|-----------------------------------------------------------------------------------------------------------------------------------|
|                     |                       |      |                                 |                                                      |       |                         |                                                                                                                                                                                                                                                                                                                                                                                                                                                                                                                                                                                                                                    | persons in clinics, increasing resource allocation to this field and creating policies so all healthcare settings are safe places |
| Lykens et al. (47)  | LGBTQI+ Health        | 2018 | Qualitative                     | 10 genderqueer/nonbinary youth, 23-33 yo             | USA   | HC utilization          | Providers approaching trans from a binary transgender perspective. Consequently, participants sometimes "borrowed" a binary transgender label to receive care, modified the healthcare they were prescribed, or went without healthcare, feeling disrespected and frustrated                                                                                                                                                                                                                                                                                                                                                       |                                                                                                                                   |
| Puckett et al. (46) | Sex Res Social Policy | 2018 | Survey data                     | 256 trans/gender nonconforming individuals, 16-73 yo | USA   | HC utilization          | Finances and insurance issues (pursue of hormone therapy, surgery, puberty blockers), a lack of service availability (and competent professionals), and fears or worries (anxiety being asked invasive questions, stigma, denial of care). systemic issues (problematic guidelines, unsafe environment) and incidents of bias within medical and mental health fields, as well as a lack of medical provider awareness and education. Other themes were interpersonal barriers (e.g., fears of rejection); age and need of parental consent for minors; other medical issues; and a lack of information about how to acquire care. |                                                                                                                                   |
| Lee et al. (45)     | Epidemiol Health      | 2018 | National cross-sectional survey | 278 trans adults                                     | Korea | Transition-related care | Costs, negative experiences in healthcare settings, lack of specialized healthcare professionals and facilities, social stigma against transgender people.                                                                                                                                                                                                                                                                                                                                                                                                                                                                         |                                                                                                                                   |



|                      |                  |      |                        |                                                        |        |                         |                                                                                                                                                                                                                                                                                                                                                                                                                                                             |                                                                                                                                                                             |
|----------------------|------------------|------|------------------------|--------------------------------------------------------|--------|-------------------------|-------------------------------------------------------------------------------------------------------------------------------------------------------------------------------------------------------------------------------------------------------------------------------------------------------------------------------------------------------------------------------------------------------------------------------------------------------------|-----------------------------------------------------------------------------------------------------------------------------------------------------------------------------|
| Gonzales et al. (44) | Milbank Q        | 2017 | National survey        | 1443 trans/gender non-conforming and 314450 cis adults | USA    | HC utilization          | Transgender adults were more likely to be nonwhite, sexual minority, and socioeconomically disadvantaged compared to cisgender adults. Trans women were more likely to have no health insurance compared to cisgender women; transgender men were more likely to have no health insurance and no usual source of care; gender non-conforming adults were more likely to have unmet medical care needs due to cost and no routine checkup in the prior year. |                                                                                                                                                                             |
| Clark et al. (43)    | Fam Pract        | 2018 | Cross-sectional survey | 923 trans youth, 14-25 yo                              | Canada | PHC delivery            | Levels of comfort with family doctor were negatively correlated with foregone mental healthcare in the previous 12 months, cost barriers, previous negative experiences with HCPs, uneducated HCPs about trans issues                                                                                                                                                                                                                                       | Comfort with a family doctor was positively correlated with both general health and mental health status, as was having a doctor who was aware of one's transgender status. |
| Hughto et al. (42)   | Transgend Health | 2017 | Online survey          | 364 trans adults                                       | USA    | Transition-related care | Younger age, low income, low educational attainment, private insurance coverage, and healthcare discrimination were significantly associated with being unable to access transition-related care                                                                                                                                                                                                                                                            |                                                                                                                                                                             |
| Dowshen et al. (41)  | Transgend Health | 2017 | Mixed-methods          | 25 trans women, 16-24 yo                               | USA    | HC utilization          | Lack of respect for or misunderstanding of gender identity, mismatch of mental health needs with available provider skills, challenges in finding HIV prevention services                                                                                                                                                                                                                                                                                   | Importance of workforce diversity, including representation of trans women in care teams.                                                                                   |
| Ross et al. (40)     | Transgend Health | 2016 | Qualitative            | 10 transgender adults, HCPs, friends/family            | Canada | HC utilization          |                                                                                                                                                                                                                                                                                                                                                                                                                                                             | Knowledge of trans issues, respect though the encounter, willingness to make referrals, connection/communication,                                                           |

|                       |                  |      |               |                   |              |                |                                                                                                                                                                                                                                                                                                                                                       |                                                                                                                                                                                                                                                                                                                                      |
|-----------------------|------------------|------|---------------|-------------------|--------------|----------------|-------------------------------------------------------------------------------------------------------------------------------------------------------------------------------------------------------------------------------------------------------------------------------------------------------------------------------------------------------|--------------------------------------------------------------------------------------------------------------------------------------------------------------------------------------------------------------------------------------------------------------------------------------------------------------------------------------|
|                       |                  |      |               |                   |              |                |                                                                                                                                                                                                                                                                                                                                                       | listening, normalizing the transgender experience, ensuring support systems in place, helping in informed decision making, writing letters of support, letting transgender individuals take charge of their transition, self-educating, careful planning of one's healthcare journey, viewing healthcare as a do-it-yourself project |
| Porsch et al. (39)    | Transgend Health | 2016 | Online survey | 113 trans adults  | USA          | HC utilization |                                                                                                                                                                                                                                                                                                                                                       | assurance that staff received trans sensitivity training (mean 3.8), the existence of gender identity nondiscrimination policies (mean 3.7), and the availability of transgender-specific services, such as hormone therapy (mean 3.7).                                                                                              |
| Rodriguez et al. (38) | Arch Sex Behav   | 2018 | Survey data   | 6106 trans adults | USA          | HC utilization | Being recognized as transgender to any extent had a significant effect on perceived discrimination in health care. Always recognized as transgender showed significant associations with social service and mental health settings, sex work and other street economy were also significantly associated with discrimination in health-care settings. |                                                                                                                                                                                                                                                                                                                                      |
| Spencer et al. (37)   | PLoS One         | 2017 | Qualitative   | 12 HCPs           | South Africa | Care provision | a small minority of healthcare providers offer gender affirming care, this is almost exclusively on their own initiative and is usually unsupported by wider structures and                                                                                                                                                                           |                                                                                                                                                                                                                                                                                                                                      |

|                      |                           |      |               |                             |              |                             |                                                                                                                                                                                                                                                                                                                                                                                                                                                                                                                          |                                                                                     |
|----------------------|---------------------------|------|---------------|-----------------------------|--------------|-----------------------------|--------------------------------------------------------------------------------------------------------------------------------------------------------------------------------------------------------------------------------------------------------------------------------------------------------------------------------------------------------------------------------------------------------------------------------------------------------------------------------------------------------------------------|-------------------------------------------------------------------------------------|
|                      |                           |      |               |                             |              |                             | institutions. The ad hoc, discretionary nature of services means that access to care is dependent on whether a transgender person is fortunate enough to access a sympathetic and knowledgeable healthcare provider.                                                                                                                                                                                                                                                                                                     |                                                                                     |
| Hines et al. (34)    | J Assoc Nurses AIDS Care  | 2017 | Qualitative   | 18 trans women with HIV     | USA          | HIV care                    | Reluctance to face a diagnosis of HIV, concerns about lack of privacy and confidentiality, lack of support.                                                                                                                                                                                                                                                                                                                                                                                                              | Psychosocial support, direct referrals from a provider, and guidance from a friend. |
| Muller (35)          | BMC Int Health Hum Rights | 2017 | Qualitative   | > 16 LGBTQI+ adults         | South Africa | HC utilization              | Lack of public health facilities and services, both for general and LGBTQI+-specific concerns, HCPs' refusal to provide care to LGBTQI+ patients, articulation of moral judgment and disapproval of LGBTQI+ patients' identity, forced subjection of patients to religious practices, lack of knowledge about LGBTQI+ identities and health needs, leading to poor-quality care. Delayed or avoided seeking healthcare in the past, without seeking out accountability or complaint mechanisms within the health system. |                                                                                     |
| Rossmann et al. (34) | J Homosex                 | 2017 | Qualitative   | 206 LGBTQI+ youth, 18-27 yo | USA          | HC utilization              | Providers not asking about identity, internalized stigma, and belief that health and LGBTQI+Q identity are not related                                                                                                                                                                                                                                                                                                                                                                                                   |                                                                                     |
| Johns et al. (33)    | J Adolesc Health          | 2017 | Survey data   | 250 trans women, 16-24 yo   | USA          | Social determinants of care | Having a history of unstable housing was associated with significantly higher odds of problems accessing both medical care and mental healthcare due to gender identity.                                                                                                                                                                                                                                                                                                                                                 |                                                                                     |
| Lavorgna et al. (30) | Mult Scler Relat Disord   | 2017 | Online survey | 307 LGBTQI+ adults          | Italy        | Multiple sclerosis          | LGBTQI+ patients were associated with a smaller number of psychological consultations, compared to heterosexuals and more likely to change service compared to heterosexuals. The                                                                                                                                                                                                                                                                                                                                        |                                                                                     |

|                         |                               |      |                |                                 |           |                              |                                                                                                                                                                                                                                                                                                                                                                                                                                                                                                                                                                                                                                               |                                                                                                                                                                        |
|-------------------------|-------------------------------|------|----------------|---------------------------------|-----------|------------------------------|-----------------------------------------------------------------------------------------------------------------------------------------------------------------------------------------------------------------------------------------------------------------------------------------------------------------------------------------------------------------------------------------------------------------------------------------------------------------------------------------------------------------------------------------------------------------------------------------------------------------------------------------------|------------------------------------------------------------------------------------------------------------------------------------------------------------------------|
|                         |                               |      |                |                                 |           |                              | number of service changes was associated with service friendliness and occurrence of homophobic behaviors.                                                                                                                                                                                                                                                                                                                                                                                                                                                                                                                                    |                                                                                                                                                                        |
| Reisner et al. (31)     | AIDS Behav                    | 2017 | Mixed-methods  | 48 trans women, 19 HCPs         | Peru      | HIV care                     | Stigma, lack of provider training or guidelines on optimal trans care, service delivery obstacles (e.g., legal documents, spatial placement of clinics, hours of operation).                                                                                                                                                                                                                                                                                                                                                                                                                                                                  | Hiring of TW staff                                                                                                                                                     |
| Logie et al. (30)       | J Int AIDS Soc                | 2017 | Qualitative    | 8 trans women, 18-30 yo         | Jamaica   | HIV care                     | HCP mistreatment, confidentiality breaches, and HIV-related stigma. Healthcare provider discrimination and judgment in HIV testing provision presented barriers to accessing HIV services (e.g. treatment), and resulted in participants hiding their sexual orientation and/or gender identity. confidentiality concerns (clinic physical arrangements that segregated HIV testing from other health services, fear that healthcare providers would publicly disclose their status, and concerns at LGBTQI+-friendly clinics that peers would discover they were getting tested). Anticipating HCP mistreatment if they tested HIV positive. | individual (belief in benefits of knowing one's HIV status), social (social support) and structural (accessible testing) factors that can increase HIV testing uptake. |
| McPhail et al. (29)     | Can Med Educ J                | 2016 | Qualitative    | 30 trans adults, 11 HCPs        | Canada    | Medical education            | Lack of knowledge that resulted in a denial of trans-specific care and also impacted general care. Transphobia was identified as a barrier to quality care                                                                                                                                                                                                                                                                                                                                                                                                                                                                                    |                                                                                                                                                                        |
| Stinchcombe et al. (28) | Geriatrics (Basel)            | 2017 | Scoping review | LGBTQI+ older adults            | global    | General and end-of-life care | Health status, fear of discrimination and lack of trust, lack of knowledge and preparedness, cultural competence in the healthcare system.                                                                                                                                                                                                                                                                                                                                                                                                                                                                                                    | social support and chosen family, intimacy,                                                                                                                            |
| Barrington et al. (27)  | J Healthcare Poor Underserved | 2016 | Qualitative    | 26 MSM and trans women with HIV | Guatemala | HIV care                     | Stigma and discrimination due to non-normative gender expressions and / or sexual orientation. Retention-specific determinants                                                                                                                                                                                                                                                                                                                                                                                                                                                                                                                |                                                                                                                                                                        |

|                         |                                    |      |                         |                                   |            |                 |                                                                                                                                                                                                                                                                                                                                                                                                        |                                                                                                               |
|-------------------------|------------------------------------|------|-------------------------|-----------------------------------|------------|-----------------|--------------------------------------------------------------------------------------------------------------------------------------------------------------------------------------------------------------------------------------------------------------------------------------------------------------------------------------------------------------------------------------------------------|---------------------------------------------------------------------------------------------------------------|
|                         |                                    |      |                         |                                   |            |                 | included HIV clinic dynamics and limited employment opportunities.                                                                                                                                                                                                                                                                                                                                     |                                                                                                               |
| Hughto et al. (26)      | LGBTQI+ Health                     | 2016 | Survey data             | 5831 trans adults                 | USA        | HC access       | Being older, trans feminine, or a racial/ethnic minority, having low income and avoiding care due to discrimination were positively associated with care refusal                                                                                                                                                                                                                                       |                                                                                                               |
| Rocon et al. (25)       | Cien Saude Colet                   | 2016 | Qualitative             | 15 trans adults                   | Brazil     | HC access       | Disrespect toward the adopted name, discrimination, and the diagnosis required for the gender reassignment process were major limitations to accessing the healthcare system.                                                                                                                                                                                                                          |                                                                                                               |
| Safer et al. (6)        | Curr Opin Endocrinol Diabetes Obes | 2016 | Brief literature review | Trans individuals                 | Global     | HC access       | Lack of sufficiently knowledgeable providers, financial barriers, discrimination, lack of cultural competence by providers, health systems barriers, and socioeconomic barriers.                                                                                                                                                                                                                       |                                                                                                               |
| Albuquerque et al. (24) | BMC Int Health Hum Rights          | 2016 | Systematic review       | LGBTQI+ individuals               | Global     | HC access       | Heteronormative attitudes imposed by HCPs, human rights violations in access to health services.                                                                                                                                                                                                                                                                                                       |                                                                                                               |
| Whitehead et al. (23)   | PLoS One                           | 2016 | Survey data             | LBGT adults                       | USA, rural | PHC utilization | Higher stigma scores were associated with lower utilization of health services for the transgender & non-binary group.                                                                                                                                                                                                                                                                                 | higher levels of disclosure of sexual orientation were associated with greater utilization of health services |
| Bauer et al. (22)       | PLoS One                           | 2015 | Survey data             | 433 trans individuals, over 16 yo | Canada     | PHC utilization | 37.2% of transmasculine and 38.1% of transfeminine persons reported at least one trans-specific negative experience. Greater perceived physician knowledge about trans issues was associated with reduced likelihood of discomfort, and previous trans-specific negative experiences with a family physician with increased discomfort. Being previously married or having higher education associated |                                                                                                               |

|                    |                |      |                 |                                     |        |                                    |                                                                                                                                                                                                                                                                                                                                                                                                                                                                                                                                                                                |  |
|--------------------|----------------|------|-----------------|-------------------------------------|--------|------------------------------------|--------------------------------------------------------------------------------------------------------------------------------------------------------------------------------------------------------------------------------------------------------------------------------------------------------------------------------------------------------------------------------------------------------------------------------------------------------------------------------------------------------------------------------------------------------------------------------|--|
|                    |                |      |                 |                                     |        |                                    | with increased risk of discomfort among transfeminine persons.                                                                                                                                                                                                                                                                                                                                                                                                                                                                                                                 |  |
| Torres et al. (21) | BMC Pediatr    | 2015 | Qualitative     | 11 HCPs of trans youth (ages 13-21) | USA    | HC access                          | Lack of access to services, lack of social support, challenges in navigating HC system, limited HCPs' education                                                                                                                                                                                                                                                                                                                                                                                                                                                                |  |
| Winter et al. (85) | Lancet         | 2016 | Evidence review | Trans individuals                   | Global | Health, social, legislative issues | Transgender people live on the margins of society, facing stigma, discrimination, exclusion, violence, and poor health. They experience difficulties accessing appropriate health care, whether specific to their gender needs or more general in nature. Some governments are taking steps to address human rights issues and provide better legal protection for transgender people, but this action is by no means universal. The mental illness perspective that currently frames health-care provision for transgender people across much of the world is under scrutiny. |  |
| ILGA-Europe (9)    |                | 2020 | Report          | LGBTQI+I                            | Europe | Human Rights                       |                                                                                                                                                                                                                                                                                                                                                                                                                                                                                                                                                                                |  |
| Fantz et al. (2)   | Clin Biochem   | 2014 | Evidence review | Trans individuals                   | Global | HC access                          | Barriers: Stigmatization, structural and financial barriers, lack of experienced HCPs<br><br>Consequences: reluctance to disclose gender identity, consequences for long-term outcomes due to a lack of appropriate medical history including transition-related care. Even if a patient is willing to disclose their gender identity HC services lack the mechanisms necessary to collect and track this information.                                                                                                                                                         |  |
| Giannou (83)       | Durham theses, | 2017 | Qualitative     | LGBTQI+ individuals                 | Greece | Health inequalities                | a) Misinformation on health issues/needs                                                                                                                                                                                                                                                                                                                                                                                                                                                                                                                                       |  |

|  |                   |  |  |  |  |  |                                                                                                                                                                                                                                                                                                                                                                                                                                                                                                                                  |  |
|--|-------------------|--|--|--|--|--|----------------------------------------------------------------------------------------------------------------------------------------------------------------------------------------------------------------------------------------------------------------------------------------------------------------------------------------------------------------------------------------------------------------------------------------------------------------------------------------------------------------------------------|--|
|  | Durham University |  |  |  |  |  | b) Misdiagnosis<br>c) Exclusion e from preventive health care<br>d) Exclusion from sexual health information<br>e) Misreading of lesbianism as virginity<br>f) Exposure to inappropriate/ unsafe environments for disclosure<br>g) Exposure to offensive comments/jokes/ derogatory opinions on LGBTQI+ identities<br>h) Exposure to inappropriate questioning/ heterosexist assumptions<br>i) Invalidation of same-sex couples within health care<br>j) Lack of any acknowledgement of the challenges that LGBTQI+ carers face. |  |
|--|-------------------|--|--|--|--|--|----------------------------------------------------------------------------------------------------------------------------------------------------------------------------------------------------------------------------------------------------------------------------------------------------------------------------------------------------------------------------------------------------------------------------------------------------------------------------------------------------------------------------------|--|

**Abbreviations:** *HC:* health care, *PHC:* primary healthcare, *HCP:* healthcare professionals, *MSM:* men who have sex with men, *LGBTQI+:* lesbian, gay, bisexual, transgender
